# Supplementary material
Source: HighWire-hosted journal article supplement (doi:10.1101/rna.077362.120)
Supplement: Supplemental_Figure_Legends.docx [file Supplemental_Figure_Legends.docx]

# Supplementary Figure Legends

Figure S1: Relationship between PUM-mediated decay and potential confounders. **A)** Relationship between PUM-mediated decay and previously measured mRNA half-lives. mRNA half-lives for HEK293 cells determined using metabolically labeled RNA were obtained from Lugowski, Nicholson, and Rissland (2018) using publicly available data at GEO accession number GSE99517. Half-lives calculated using six time-points were averaged over two biological replicates. The red dotted line indicates the six hour time point used in this study. A slight trend is apparent of PUM-destabilized transcripts tending to be those with shorter half-lives, which is to be expected for a set of genes that by definition are actively degraded. In addition, we compared the Bohn et al. (2018) RNA abundance data to the Lugowski, Nicholson, and Rissland (2018) stability data to determine the fraction of genes that had half-lives shorter than 30 minutes in transcripts previously identified as PUM-degraded, PUM-stabilized, and undetermined using steady-state RNA abundance measurements. Of the genes present in both datasets, we found that the fraction of genes with short half-lives ( 30 minutes) was nearly identical between PUM-stabilized (5/237 = 0.021), PUM-degraded (12/504 = 0.024) and undetermined (228/10804 = 0.021) groups indicating that there is no notable bias in any of these groups towards mRNA half-lives shorter than our initial labeling time. **B)** Relationship between potential off-target siRNA sites and RNA stability in PUM KD. For each siRNA used to knockdown PUM1 and PUM2 in this study the closest match up to five mismatches was determined for each full-length transcript isoform. The minimum number of mismatches over all isoforms was plotted for each gene. Genes for which no match could be found of five mismatches or less are lumped together in the -6 category. Only matches lacking insertions or deletions were considered.

Figure 2: Reproducibility of Bru-seq and BruChase-seq. **A)** Breakout of four biological replicates for each time and condition for CCNG2 (See Figure [1](#fig:overview)B for overlaid replicates). Read coverage is shown in read per million (RPM). Traces for the siPUM condition are in orange whereas traces for the siNTC condition are shown in blue. Known isoforms for CCNG2 are represented above. Read coverage for each replicate is shown as the average in 30 bp windows over the region shown (chr4:78077800-78092000, hg19). Coverage plots were generated using pyGenomeTracks (Ramírez et al. 2018). **B)** PCA analysis of normalized count matrices for each replicate. Count matrices were normalized using the variance stabilized counts while taking the design matrix into account as recommended by the DESeq2 documentation (Love, Huber, and Anders 2014). **C)** Heatmap of hierarchically clustered samples based on the Manhattan distance between samples in the variance stabilized count matrix.

Figure S3: Additional features considered in determining PUM-mediated decay. **A)** Count of predicted conserved miRNA sites from conserved families that overlapped within 100 bp of a PRE for each gene. Stars indicate statistical significance from a Wilcoxon rank sum test compared to the 0 overlapping miRNA case. Stability in PUM knockdown is represented by a normalized interaction term between time and condition, where positive values indicate stabilization upon PUM knockdown and negative values indicate destabilization upon PUM knockdown (see Methods for details). **B)** (Above) Relationship between the fraction of optimal codons as determined by the Codon Stability Coefficient determined in HEK293 cells (Wu et al. 2019) and PUM-mediated effect as measured in our Bru-seq data. (Below) Marginal density plots of the fraction optimal codons for genes in the EFFECT and NOEFFECT classes. Median fraction optimal codons for each class are plotted with dotted lines. A significant (p 0.05, two-sided permutation test, n = 1000) difference in medians between the classes is indicated by a star. **C)** (Above) Relationship between the probability of a given PRE being unpaired in predicted RNA secondary structure. Only genes with a PRE with 0 probability of being unpaired where shown in the heatmap. All other genes are shown in the marginal y-axis density plot. (Below) Marginal density plot for genes in the EFFECT and NOEFFECT classes with median probabilities for each class shown as dotted lines. See Methods for details of secondary structure prediction.

Figure S4 (previous page): Predicting PUM-mediated effect subset by motif. **A)** Conditional random forest models for the datasets considering only genes that had at least one match to the regex motif definition in a 3′ UTR. PRE features only consider those around the regex definition. Panels are as in Figure 6B, D, and F. **B)** As in A, but for the Hafner et al. (2019) PUM2 motif. **C)** As in A, but for the SEQRS PUM1 motif. **D)** As in A, but for the SEQRS PUM2 motif.
